# Supplementary material for: Prognostic Role of Third-Day CRP, Lactate and MechanicalVentilation in Predicting ICU Mortality in Sepsis: A Single-Center Study
Source: Research Square preprint supplement (doi:10.21203/rs.3.rs-7558369/v1), 2025-09-09
Supplement: Supplementary file 1 [file 7e4d88183e97296ad3e6ca5c.docx]

# Table 4. Multicollinearity analysis (VIF values)

| Variable | VIF Value |
| --- | --- |
| Third-day CRP | 1.42 |
| Third-day Lactate | 1.36 |
| Mechanical Ventilation | 1.28 |
| Procalcitonin | 1.55 |
| Platelet Count | 1.21 |
| ALT | 1.18 |
| Neutrophil Count | 1.33 |
